# Supplementary material for: Modification of an ITO anode with a hole-transporting SAM for improved OLED device characteristics
Source: Royal Society of Chemistry journal article supplement (doi:10.1039/b206939c), 2002-01-01
Supplement: b206939c.doc [file b206939c.doc]

# Modification of an ITO anode with a hole-transporting SAM for improved OLED device characteristics

# Jaemin Lee, Byung-Jun Jung, Jeong-Ik Lee,* Hye Yong Chu, Lee-Mi Do and Hong-Ku Shim*

# Supplementary data

18.35 Å

# 3D Structure of TPA-CONH-Silane

The calculation was performed with CS Chem3D Pro software using MM2 energy minimization method.

Symbol definitions are as follows,

Cyan : hydrogen, H

Gray : carbon, C

Blue : nitrogen, N

Red : oxygen, O

Violet : silicon, Si.
